# Supplementary material
Source: publisher figshare collection journal article supplement (https://sage.figshare.com/ndownloader/files/32394672)
Supplement: Supplementary file 1 [file 32394672]

CFA\_CLEAN\_2.amw


#### D:\FACULTY\RESEARCH\COVID 19\DATA\CFA\_CLEAN\_2.amw

##### Analysis Summary

##### Date and Time

Date: Friday, September 24, 2021

Time: 9:59:16 PM

##### Title

Cfa\_clean\_2: Friday, September 24, 2021 9:59 PM

##### Groups

##### Group number 1 (Group number 1)

##### Notes for Group (Group number 1)

The model is recursive.

Sample size = 331

##### Variable Summary (Group number 1)

##### Your model contains the following variables (Group number 1)

Observed, endogenous variables

DN\_CLEANING2

DN\_CLEANING3

DN\_CLEANING4

RE\_CLEANING1

RE\_CLEANING2

RE\_CLEANING3

RE\_CLEANING4

SE\_CLEANING1

SE\_CLEANING2

SE\_CLEANING3

SE\_CLEANING4

SE\_CLEANING5

IN\_CLEANING1

IN\_CLEANING3

IN\_CLEANING4

BI\_CLEANING1

BI\_CLEANING2

BI\_CLEANING3

BEHAVIOR\_CLEANING\_9

BEHAVIOR\_CLEANING\_8

BEHAVIOR\_CLEANING\_7

BEHAVIOR\_CLEANING\_6

BEHAVIOR\_CLEANING\_5

BEHAVIOR\_CLEANING\_4

BEHAVIOR\_CLEANING\_3

BEHAVIOR\_CLEANING\_2

BEHAVIOR\_CLEANING\_1

Susceptib4

Susceptib3

Susceptib2

Susceptib1

Severity4

Severity2

Severity1

Severity3

Unobserved, endogenous variables

RES\_CLEAN

SEF\_CLEAN

SEV\_CD

SUS\_CD

Unobserved, exogenous variables

DES\_CLEAN

e2

e3

e4

e5

e6

e7

e8

e9

e10

e11

e12

e13

EFF\_CLEAN

e14

e15

INJ\_CLEAN

e16

e17

e18

INTENT\_CLEAN

e19

e20

e21

BE\_CLEAN

e23

e24

e25

e26

e27

e28

e29

e30

e31

e32

e33

e34

e35

e36

e37

e38

e39

RP\_CD

e40

e41

##### Variable counts (Group number 1)

|  |  |
| --- | --- |
| Number of variables in your model: | 84 |
| Number of observed variables: | 35 |
| Number of unobserved variables: | 49 |
| Number of exogenous variables: | 45 |
| Number of endogenous variables: | 39 |

##### Parameter Summary (Group number 1)

|  | Weights | Covariances | Variances | Means | Intercepts | Total |
| --- | --- | --- | --- | --- | --- | --- |
| Fixed | 49 | 0 | 0 | 0 | 0 | 49 |
| Labeled | 0 | 0 | 0 | 0 | 0 | 0 |
| Unlabeled | 29 | 15 | 45 | 0 | 0 | 89 |
| Total | 78 | 15 | 45 | 0 | 0 | 138 |

##### Models

##### Default model (Default model)

##### Notes for Model (Default model)

##### Computation of degrees of freedom (Default model)

|  |  |
| --- | --- |
| Number of distinct sample moments: | 630 |
| Number of distinct parameters to be estimated: | 89 |
| Degrees of freedom (630 - 89): | 541 |

##### Result (Default model)

Minimum was achieved

Chi-square = 1393.214

Degrees of freedom = 541

Probability level = .000

##### Group number 1 (Group number 1 - Default model)

##### Estimates (Group number 1 - Default model)

##### Scalar Estimates (Group number 1 - Default model)

##### Maximum Likelihood Estimates

##### Regression Weights: (Group number 1 - Default model)

|  |  |  | Estimate | S.E. | C.R. | P | Label |
| --- | --- | --- | --- | --- | --- | --- | --- |
| RES\_CLEAN | <--- | EFF\_CLEAN | .882 | .062 | 14.306 | \*\*\* |  |
| SEF\_CLEAN | <--- | EFF\_CLEAN | 1.000 |  |
| SEV\_CD | <--- | RP\_CD | 1.000 |  |
| SUS\_CD | <--- | RP\_CD | .432 | .176 | 2.459 | .014 |  |
| DN\_CLEANING2 | <--- | DES\_CLEAN | .969 | .039 | 25.105 | \*\*\* |  |
| DN\_CLEANING3 | <--- | DES\_CLEAN | .903 | .037 | 24.527 | \*\*\* |  |
| DN\_CLEANING4 | <--- | DES\_CLEAN | 1.000 |  |
| RE\_CLEANING1 | <--- | RES\_CLEAN | 1.000 |  |
| RE\_CLEANING2 | <--- | RES\_CLEAN | .858 | .090 | 9.482 | \*\*\* |  |
| RE\_CLEANING3 | <--- | RES\_CLEAN | 1.009 | .048 | 20.806 | \*\*\* |  |
| RE\_CLEANING4 | <--- | RES\_CLEAN | 1.055 | .053 | 19.830 | \*\*\* |  |
| SE\_CLEANING1 | <--- | SEF\_CLEAN | 1.000 |  |
| SE\_CLEANING2 | <--- | SEF\_CLEAN | .814 | .047 | 17.384 | \*\*\* |  |
| SE\_CLEANING3 | <--- | SEF\_CLEAN | 1.067 | .058 | 18.348 | \*\*\* |  |
| SE\_CLEANING4 | <--- | SEF\_CLEAN | 1.047 | .055 | 18.990 | \*\*\* |  |
| SE\_CLEANING5 | <--- | SEF\_CLEAN | .770 | .045 | 17.071 | \*\*\* |  |
| IN\_CLEANING1 | <--- | INJ\_CLEAN | 1.000 |  |
| IN\_CLEANING3 | <--- | INJ\_CLEAN | 1.048 | .086 | 12.175 | \*\*\* |  |
| IN\_CLEANING4 | <--- | INJ\_CLEAN | 1.106 | .092 | 11.976 | \*\*\* |  |
| BI\_CLEANING1 | <--- | INTENT\_CLEAN | 1.000 |  |
| BI\_CLEANING2 | <--- | INTENT\_CLEAN | 1.001 | .035 | 28.593 | \*\*\* |  |
| BI\_CLEANING3 | <--- | INTENT\_CLEAN | 1.030 | .043 | 23.836 | \*\*\* |  |
| BEHAVIOR\_CLEANING\_9 | <--- | BE\_CLEAN | 1.000 |  |
| BEHAVIOR\_CLEANING\_8 | <--- | BE\_CLEAN | .836 | .059 | 14.211 | \*\*\* |  |
| BEHAVIOR\_CLEANING\_7 | <--- | BE\_CLEAN | 1.185 | .069 | 17.212 | \*\*\* |  |
| BEHAVIOR\_CLEANING\_6 | <--- | BE\_CLEAN | .913 | .061 | 14.978 | \*\*\* |  |
| BEHAVIOR\_CLEANING\_5 | <--- | BE\_CLEAN | 1.070 | .066 | 16.132 | \*\*\* |  |
| BEHAVIOR\_CLEANING\_4 | <--- | BE\_CLEAN | 1.189 | .071 | 16.735 | \*\*\* |  |
| BEHAVIOR\_CLEANING\_3 | <--- | BE\_CLEAN | 1.245 | .070 | 17.729 | \*\*\* |  |
| BEHAVIOR\_CLEANING\_2 | <--- | BE\_CLEAN | 1.231 | .066 | 18.713 | \*\*\* |  |
| BEHAVIOR\_CLEANING\_1 | <--- | BE\_CLEAN | .983 | .061 | 16.037 | \*\*\* |  |
| Severity3 | <--- | SEV\_CD | 1.000 |  |
| Severity1 | <--- | SEV\_CD | 1.633 | .167 | 9.755 | \*\*\* |  |
| Severity2 | <--- | SEV\_CD | 1.088 | .122 | 8.900 | \*\*\* |  |
| Severity4 | <--- | SEV\_CD | 1.777 | .176 | 10.089 | \*\*\* |  |
| Susceptib1 | <--- | SUS\_CD | 1.063 | .075 | 14.113 | \*\*\* |  |
| Susceptib2 | <--- | SUS\_CD | .811 | .068 | 11.871 | \*\*\* |  |
| Susceptib3 | <--- | SUS\_CD | 1.064 | .074 | 14.443 | \*\*\* |  |
| Susceptib4 | <--- | SUS\_CD | 1.000 |  |

##### Standardized Regression Weights: (Group number 1 - Default model)

|  |  |  | Estimate |
| --- | --- | --- | --- |
| RES\_CLEAN | <--- | EFF\_CLEAN | .877 |
| SEF\_CLEAN | <--- | EFF\_CLEAN | .892 |
| SEV\_CD | <--- | RP\_CD | 1.484 |
| SUS\_CD | <--- | RP\_CD | .374 |
| DN\_CLEANING2 | <--- | DES\_CLEAN | .884 |
| DN\_CLEANING3 | <--- | DES\_CLEAN | .876 |
| DN\_CLEANING4 | <--- | DES\_CLEAN | .925 |
| RE\_CLEANING1 | <--- | RES\_CLEAN | .841 |
| RE\_CLEANING2 | <--- | RES\_CLEAN | .503 |
| RE\_CLEANING3 | <--- | RES\_CLEAN | .899 |
| RE\_CLEANING4 | <--- | RES\_CLEAN | .871 |
| SE\_CLEANING1 | <--- | SEF\_CLEAN | .849 |
| SE\_CLEANING2 | <--- | SEF\_CLEAN | .792 |
| SE\_CLEANING3 | <--- | SEF\_CLEAN | .820 |
| SE\_CLEANING4 | <--- | SEF\_CLEAN | .837 |
| SE\_CLEANING5 | <--- | SEF\_CLEAN | .783 |
| IN\_CLEANING1 | <--- | INJ\_CLEAN | .796 |
| IN\_CLEANING3 | <--- | INJ\_CLEAN | .662 |
| IN\_CLEANING4 | <--- | INJ\_CLEAN | .652 |
| BI\_CLEANING1 | <--- | INTENT\_CLEAN | .933 |
| BI\_CLEANING2 | <--- | INTENT\_CLEAN | .914 |
| BI\_CLEANING3 | <--- | INTENT\_CLEAN | .853 |
| BEHAVIOR\_CLEANING\_9 | <--- | BE\_CLEAN | .791 |
| BEHAVIOR\_CLEANING\_8 | <--- | BE\_CLEAN | .718 |
| BEHAVIOR\_CLEANING\_7 | <--- | BE\_CLEAN | .832 |
| BEHAVIOR\_CLEANING\_6 | <--- | BE\_CLEAN | .748 |
| BEHAVIOR\_CLEANING\_5 | <--- | BE\_CLEAN | .792 |
| BEHAVIOR\_CLEANING\_4 | <--- | BE\_CLEAN | .815 |
| BEHAVIOR\_CLEANING\_3 | <--- | BE\_CLEAN | .850 |
| BEHAVIOR\_CLEANING\_2 | <--- | BE\_CLEAN | .883 |
| BEHAVIOR\_CLEANING\_1 | <--- | BE\_CLEAN | .789 |
| Severity3 | <--- | SEV\_CD | .603 |
| Severity1 | <--- | SEV\_CD | .726 |
| Severity2 | <--- | SEV\_CD | .632 |
| Severity4 | <--- | SEV\_CD | .773 |
| Susceptib1 | <--- | SUS\_CD | .781 |
| Susceptib2 | <--- | SUS\_CD | .664 |
| Susceptib3 | <--- | SUS\_CD | .800 |
| Susceptib4 | <--- | SUS\_CD | .792 |

##### Covariances: (Group number 1 - Default model)

|  |  |  | Estimate | S.E. | C.R. | P | Label |
| --- | --- | --- | --- | --- | --- | --- | --- |
| DES\_CLEAN | <--> | EFF\_CLEAN | 1.158 | .119 | 9.692 | \*\*\* |  |
| DES\_CLEAN | <--> | INTENT\_CLEAN | 1.220 | .122 | 10.016 | \*\*\* |  |
| DES\_CLEAN | <--> | BE\_CLEAN | .761 | .088 | 8.652 | \*\*\* |  |
| EFF\_CLEAN | <--> | INTENT\_CLEAN | 1.110 | .109 | 10.197 | \*\*\* |  |
| EFF\_CLEAN | <--> | BE\_CLEAN | .594 | .072 | 8.240 | \*\*\* |  |
| INTENT\_CLEAN | <--> | BE\_CLEAN | .693 | .078 | 8.901 | \*\*\* |  |
| INJ\_CLEAN | <--> | BE\_CLEAN | .542 | .071 | 7.639 | \*\*\* |  |
| EFF\_CLEAN | <--> | INJ\_CLEAN | .909 | .100 | 9.109 | \*\*\* |  |
| INJ\_CLEAN | <--> | INTENT\_CLEAN | 1.046 | .106 | 9.853 | \*\*\* |  |
| DES\_CLEAN | <--> | INJ\_CLEAN | 1.229 | .123 | 9.967 | \*\*\* |  |
| INTENT\_CLEAN | <--> | RP\_CD | .443 | .072 | 6.159 | \*\*\* |  |
| EFF\_CLEAN | <--> | RP\_CD | .452 | .070 | 6.455 | \*\*\* |  |
| INJ\_CLEAN | <--> | RP\_CD | .321 | .064 | 5.024 | \*\*\* |  |
| DES\_CLEAN | <--> | RP\_CD | .437 | .079 | 5.562 | \*\*\* |  |
| BE\_CLEAN | <--> | RP\_CD | .193 | .046 | 4.231 | \*\*\* |  |

##### Correlations: (Group number 1 - Default model)

|  |  |  | Estimate |
| --- | --- | --- | --- |
| DES\_CLEAN | <--> | EFF\_CLEAN | .831 |
| DES\_CLEAN | <--> | INTENT\_CLEAN | .743 |
| DES\_CLEAN | <--> | BE\_CLEAN | .647 |
| EFF\_CLEAN | <--> | INTENT\_CLEAN | .909 |
| EFF\_CLEAN | <--> | BE\_CLEAN | .679 |
| INTENT\_CLEAN | <--> | BE\_CLEAN | .673 |
| INJ\_CLEAN | <--> | BE\_CLEAN | .607 |
| EFF\_CLEAN | <--> | INJ\_CLEAN | .860 |
| INJ\_CLEAN | <--> | INTENT\_CLEAN | .840 |
| DES\_CLEAN | <--> | INJ\_CLEAN | .864 |
| INTENT\_CLEAN | <--> | RP\_CD | .326 |
| EFF\_CLEAN | <--> | RP\_CD | .392 |
| INJ\_CLEAN | <--> | RP\_CD | .273 |
| DES\_CLEAN | <--> | RP\_CD | .281 |
| BE\_CLEAN | <--> | RP\_CD | .198 |

##### Variances: (Group number 1 - Default model)

|  |  |  | Estimate | S.E. | C.R. | P | Label |
| --- | --- | --- | --- | --- | --- | --- | --- |
| DES\_CLEAN |  |  | 1.877 | .172 | 10.892 | \*\*\* |  |
| EFF\_CLEAN |  |  | 1.036 | .129 | 8.048 | \*\*\* |  |
| INJ\_CLEAN |  |  | 1.078 | .132 | 8.137 | \*\*\* |  |
| INTENT\_CLEAN |  |  | 1.438 | .129 | 11.110 | \*\*\* |  |
| BE\_CLEAN |  |  | .739 | .087 | 8.525 | \*\*\* |  |
| RP\_CD |  |  | 1.284 | .499 | 2.571 | .010 |  |
| e14 |  |  | .242 | .039 | 6.141 | \*\*\* |  |
| e15 |  |  | .265 | .046 | 5.723 | \*\*\* |  |
| e40 |  |  | -.700 | .472 | -1.483 | .138 |  |
| e41 |  |  | 1.478 | .204 | 7.239 | \*\*\* |  |
| e2 |  |  | .490 | .051 | 9.604 | \*\*\* |  |
| e3 |  |  | .465 | .047 | 9.892 | \*\*\* |  |
| e4 |  |  | .316 | .042 | 7.540 | \*\*\* |  |
| e5 |  |  | .435 | .042 | 10.243 | \*\*\* |  |
| e6 |  |  | 2.273 | .182 | 12.492 | \*\*\* |  |
| e7 |  |  | .253 | .031 | 8.253 | \*\*\* |  |
| e8 |  |  | .370 | .039 | 9.404 | \*\*\* |  |
| e9 |  |  | .502 | .049 | 10.194 | \*\*\* |  |
| e10 |  |  | .511 | .046 | 11.128 | \*\*\* |  |
| e11 |  |  | .723 | .067 | 10.752 | \*\*\* |  |
| e12 |  |  | .607 | .058 | 10.443 | \*\*\* |  |
| e13 |  |  | .487 | .043 | 11.232 | \*\*\* |  |
| e16 |  |  | .623 | .069 | 9.078 | \*\*\* |  |
| e17 |  |  | 1.520 | .134 | 11.369 | \*\*\* |  |
| e18 |  |  | 1.781 | .156 | 11.448 | \*\*\* |  |
| e19 |  |  | .213 | .028 | 7.649 | \*\*\* |  |
| e20 |  |  | .285 | .032 | 8.892 | \*\*\* |  |
| e21 |  |  | .571 | .053 | 10.836 | \*\*\* |  |
| e23 |  |  | .442 | .038 | 11.688 | \*\*\* |  |
| e24 |  |  | .485 | .040 | 12.111 | \*\*\* |  |
| e25 |  |  | .462 | .041 | 11.288 | \*\*\* |  |
| e26 |  |  | .483 | .040 | 11.965 | \*\*\* |  |
| e27 |  |  | .501 | .043 | 11.677 | \*\*\* |  |
| e28 |  |  | .530 | .046 | 11.479 | \*\*\* |  |
| e29 |  |  | .440 | .040 | 11.039 | \*\*\* |  |
| e30 |  |  | .315 | .030 | 10.374 | \*\*\* |  |
| e31 |  |  | .433 | .037 | 11.705 | \*\*\* |  |
| e32 |  |  | 1.018 | .111 | 9.156 | \*\*\* |  |
| e33 |  |  | 1.091 | .122 | 8.946 | \*\*\* |  |
| e34 |  |  | 1.431 | .128 | 11.160 | \*\*\* |  |
| e35 |  |  | 1.245 | .132 | 9.440 | \*\*\* |  |
| e36 |  |  | 1.242 | .142 | 8.727 | \*\*\* |  |
| e37 |  |  | 1.041 | .094 | 11.030 | \*\*\* |  |
| e38 |  |  | 1.396 | .143 | 9.749 | \*\*\* |  |
| e39 |  |  | 1.021 | .090 | 11.288 | \*\*\* |  |

##### Matrices (Group number 1 - Default model)

##### Residual Covariances (Group number 1 - Default model)

|  | Severity3 | Severity1 | Severity2 | Severity4 | Susceptib1 | Susceptib2 | Susceptib3 | Susceptib4 | BEHAVIOR\_CLEANING\_1 | BEHAVIOR\_CLEANING\_2 | BEHAVIOR\_CLEANING\_3 | BEHAVIOR\_CLEANING\_4 | BEHAVIOR\_CLEANING\_5 | BEHAVIOR\_CLEANING\_6 | BEHAVIOR\_CLEANING\_7 | BEHAVIOR\_CLEANING\_8 | BEHAVIOR\_CLEANING\_9 | BI\_CLEANING3 | BI\_CLEANING2 | BI\_CLEANING1 | IN\_CLEANING4 | IN\_CLEANING3 | IN\_CLEANING1 | SE\_CLEANING5 | SE\_CLEANING4 | SE\_CLEANING3 | SE\_CLEANING2 | SE\_CLEANING1 | RE\_CLEANING4 | RE\_CLEANING3 | RE\_CLEANING2 | RE\_CLEANING1 | DN\_CLEANING4 | DN\_CLEANING3 | DN\_CLEANING2 |
| --- | --- | --- | --- | --- | --- | --- | --- | --- | --- | --- | --- | --- | --- | --- | --- | --- | --- | --- | --- | --- | --- | --- | --- | --- | --- | --- | --- | --- | --- | --- | --- | --- | --- | --- | --- |
| Severity3 | .000 |
| Severity1 | -.199 | .000 |
| Severity2 | .293 | -.051 | .000 |
| Severity4 | -.192 | .315 | -.179 | .000 |
| Susceptib1 | -.001 | .269 | -.256 | .628 | .000 |
| Susceptib2 | .094 | -.121 | -.210 | .037 | .006 | .000 |
| Susceptib3 | .012 | -.056 | -.252 | .118 | -.146 | .118 | .000 |
| Susceptib4 | -.221 | -.184 | -.332 | .160 | .047 | -.108 | .077 | .000 |
| BEHAVIOR\_CLEANING\_1 | .012 | .023 | .103 | -.076 | -.006 | -.144 | .025 | -.018 | .000 |
| BEHAVIOR\_CLEANING\_2 | .084 | -.023 | .135 | -.028 | .057 | -.135 | .103 | .098 | -.025 | .000 |
| BEHAVIOR\_CLEANING\_3 | .030 | -.004 | -.063 | -.096 | -.091 | -.214 | .030 | .024 | -.080 | .053 | .000 |
| BEHAVIOR\_CLEANING\_4 | -.062 | -.018 | -.047 | -.118 | -.108 | -.346 | -.115 | -.045 | -.033 | .035 | .165 | .000 |
| BEHAVIOR\_CLEANING\_5 | .081 | .033 | .062 | .002 | .101 | -.069 | .126 | .042 | -.013 | -.009 | .018 | -.037 | .000 |
| BEHAVIOR\_CLEANING\_6 | .055 | -.043 | .094 | -.113 | .064 | .006 | .134 | .074 | .122 | -.022 | -.060 | -.149 | .016 | .000 |
| BEHAVIOR\_CLEANING\_7 | .028 | -.106 | .119 | -.184 | -.189 | -.263 | -.104 | -.025 | -.039 | -.014 | .018 | .068 | .080 | -.036 | .000 |
| BEHAVIOR\_CLEANING\_8 | .070 | .040 | .144 | .032 | -.013 | -.065 | .073 | .007 | .050 | -.047 | -.082 | -.043 | -.045 | .070 | -.018 | .000 |
| BEHAVIOR\_CLEANING\_9 | .002 | .002 | .117 | -.055 | .034 | -.014 | .117 | .078 | .066 | -.006 | -.063 | -.106 | -.064 | .131 | -.047 | .164 | .000 |
| BI\_CLEANING3 | .181 | -.047 | .248 | -.101 | .184 | -.087 | .107 | .179 | .106 | .023 | -.060 | -.050 | .107 | -.005 | .055 | .045 | .032 | .000 |
| BI\_CLEANING2 | .164 | -.094 | .211 | -.139 | .041 | -.167 | .001 | .034 | .026 | -.011 | -.052 | -.064 | .048 | -.040 | -.089 | .060 | .008 | -.028 | .000 |
| BI\_CLEANING1 | .135 | -.154 | .169 | -.138 | .027 | -.114 | .074 | .132 | .048 | .002 | -.058 | -.058 | .066 | -.028 | .016 | .032 | .020 | -.015 | .018 | .000 |
| IN\_CLEANING4 | .194 | .217 | .194 | .153 | .198 | -.191 | .160 | .171 | .022 | -.033 | .012 | .038 | -.038 | -.176 | -.039 | -.109 | -.087 | .075 | -.120 | -.179 | .000 |
| IN\_CLEANING3 | -.044 | .042 | -.038 | -.129 | .052 | -.373 | -.196 | .042 | .014 | -.028 | -.041 | .103 | .001 | -.171 | .095 | -.058 | -.099 | .096 | -.080 | -.121 | .514 | .000 |
| IN\_CLEANING1 | .087 | -.145 | .099 | -.156 | .083 | -.056 | -.049 | .145 | .050 | .049 | .042 | .093 | .055 | -.062 | -.001 | .019 | -.076 | .090 | .078 | .062 | -.118 | -.093 | .000 |
| SE\_CLEANING5 | .272 | -.107 | .229 | -.114 | .028 | .081 | .044 | .032 | -.058 | -.034 | -.091 | -.113 | .072 | -.029 | -.030 | .068 | .009 | .052 | .034 | .054 | .034 | -.101 | .152 | .000 |
| SE\_CLEANING4 | -.007 | -.286 | .049 | -.329 | -.025 | -.162 | -.035 | -.042 | .115 | -.046 | -.006 | .034 | .175 | -.008 | .007 | .038 | .055 | -.160 | -.126 | -.128 | -.109 | -.158 | -.054 | -.038 | .000 |
| SE\_CLEANING3 | .040 | -.205 | .098 | -.295 | -.034 | -.232 | -.106 | -.066 | .185 | .168 | .119 | .188 | .236 | .156 | .189 | .164 | .170 | .149 | .038 | .012 | -.047 | .047 | .095 | -.133 | .062 | .000 |
| SE\_CLEANING2 | .207 | -.249 | .310 | -.185 | -.050 | -.081 | .037 | .045 | .030 | .004 | -.052 | -.050 | -.014 | .005 | -.010 | .035 | .018 | .123 | .063 | .094 | -.065 | -.060 | .072 | .077 | -.015 | -.071 | .000 |
| SE\_CLEANING1 | .060 | -.260 | -.007 | -.371 | -.059 | -.120 | -.171 | -.144 | .066 | -.021 | .035 | .075 | .218 | .062 | .088 | .053 | .062 | -.063 | -.084 | -.020 | -.136 | -.167 | -.005 | -.007 | .115 | .053 | -.081 | .000 |
| RE\_CLEANING4 | .375 | -.055 | .298 | -.036 | .093 | .072 | .134 | -.049 | -.062 | -.085 | -.150 | -.133 | -.041 | -.105 | -.054 | -.011 | -.040 | .102 | -.013 | .007 | -.044 | -.117 | .025 | .165 | -.129 | -.091 | .112 | -.043 | .000 |
| RE\_CLEANING3 | .238 | -.023 | .261 | -.023 | .058 | -.038 | .067 | .026 | -.011 | -.017 | -.088 | -.074 | .026 | -.079 | -.046 | .026 | -.018 | .059 | -.017 | -.022 | -.079 | -.092 | .083 | .085 | -.044 | -.061 | .101 | -.018 | .011 | .000 |
| RE\_CLEANING2 | .271 | -.025 | .204 | .068 | .210 | .363 | .338 | .133 | -.119 | -.146 | -.220 | -.235 | -.126 | -.231 | -.224 | -.124 | -.138 | .024 | -.087 | -.016 | -.177 | -.167 | .070 | .065 | -.186 | -.227 | .012 | -.088 | .057 | -.084 | .000 |
| RE\_CLEANING1 | .217 | -.088 | .226 | -.118 | .040 | -.127 | .069 | .003 | .006 | .006 | -.047 | -.081 | .036 | -.079 | -.039 | .025 | -.020 | .043 | .011 | .017 | .025 | -.003 | .124 | .080 | -.074 | -.060 | .116 | -.071 | -.027 | -.001 | .140 | .000 |
| DN\_CLEANING4 | .176 | -.089 | .124 | -.152 | .026 | -.187 | -.012 | .052 | .077 | .100 | -.031 | .071 | .024 | -.009 | -.029 | .048 | .015 | .132 | .008 | -.079 | .045 | -.080 | -.071 | .042 | -.094 | .214 | .003 | -.059 | -.072 | -.072 | -.084 | -.036 | .000 |
| DN\_CLEANING3 | .107 | -.041 | .232 | -.074 | -.026 | -.227 | .025 | -.043 | -.006 | .004 | -.058 | .033 | .065 | -.093 | .014 | .001 | -.015 | .220 | .039 | .006 | .106 | .038 | .044 | .126 | .038 | .328 | .102 | -.002 | -.032 | -.050 | -.052 | -.003 | -.004 | .000 |
| DN\_CLEANING2 | -.004 | -.156 | .119 | -.193 | -.023 | -.381 | -.116 | -.105 | .011 | .018 | -.109 | .013 | .008 | -.130 | -.114 | -.058 | -.095 | .035 | .010 | -.105 | -.006 | .087 | .005 | -.014 | .044 | .295 | .107 | -.064 | -.138 | -.058 | -.168 | .010 | .025 | -.034 | .000 |

##### Standardized Residual Covariances (Group number 1 - Default model)

|  | Severity3 | Severity1 | Severity2 | Severity4 | Susceptib1 | Susceptib2 | Susceptib3 | Susceptib4 | BEHAVIOR\_CLEANING\_1 | BEHAVIOR\_CLEANING\_2 | BEHAVIOR\_CLEANING\_3 | BEHAVIOR\_CLEANING\_4 | BEHAVIOR\_CLEANING\_5 | BEHAVIOR\_CLEANING\_6 | BEHAVIOR\_CLEANING\_7 | BEHAVIOR\_CLEANING\_8 | BEHAVIOR\_CLEANING\_9 | BI\_CLEANING3 | BI\_CLEANING2 | BI\_CLEANING1 | IN\_CLEANING4 | IN\_CLEANING3 | IN\_CLEANING1 | SE\_CLEANING5 | SE\_CLEANING4 | SE\_CLEANING3 | SE\_CLEANING2 | SE\_CLEANING1 | RE\_CLEANING4 | RE\_CLEANING3 | RE\_CLEANING2 | RE\_CLEANING1 | DN\_CLEANING4 | DN\_CLEANING3 | DN\_CLEANING2 |
| --- | --- | --- | --- | --- | --- | --- | --- | --- | --- | --- | --- | --- | --- | --- | --- | --- | --- | --- | --- | --- | --- | --- | --- | --- | --- | --- | --- | --- | --- | --- | --- | --- | --- | --- | --- |
| Severity3 | .000 |
| Severity1 | -1.518 | .000 |
| Severity2 | 2.984 | -.370 | .000 |
| Severity4 | -1.423 | 1.654 | -1.267 | .000 |
| Susceptib1 | -.005 | 1.518 | -1.910 | 3.449 | .000 |
| Susceptib2 | .822 | -.772 | -1.762 | .230 | .033 | .000 |
| Susceptib3 | .094 | -.323 | -1.923 | .664 | -.721 | .679 | .000 |
| Susceptib4 | -1.852 | -1.118 | -2.673 | .949 | .244 | -.654 | .412 | .000 |
| BEHAVIOR\_CLEANING\_1 | .160 | .227 | 1.317 | -.723 | -.060 | -1.522 | .242 | -.180 | .000 |
| BEHAVIOR\_CLEANING\_2 | .992 | -.198 | 1.531 | -.237 | .484 | -1.274 | .894 | .895 | -.286 | .000 |
| BEHAVIOR\_CLEANING\_3 | .341 | -.031 | -.677 | -.771 | -.735 | -1.925 | .246 | .208 | -.890 | .507 | .000 |
| BEHAVIOR\_CLEANING\_4 | -.702 | -.147 | -.514 | -.956 | -.877 | -3.129 | -.952 | -.395 | -.371 | .341 | 1.561 | .000 |
| BEHAVIOR\_CLEANING\_5 | .997 | .295 | .732 | .019 | .883 | -.679 | 1.127 | .401 | -.164 | -.095 | .186 | -.387 | .000 |
| BEHAVIOR\_CLEANING\_6 | .748 | -.431 | 1.228 | -1.095 | .622 | .068 | 1.331 | .777 | 1.702 | -.261 | -.692 | -1.756 | .206 | .000 |
| BEHAVIOR\_CLEANING\_7 | .328 | -.902 | 1.327 | -1.528 | -1.567 | -2.433 | -.886 | -.225 | -.446 | -.140 | .173 | .666 | .859 | -.433 | .000 |
| BEHAVIOR\_CLEANING\_8 | .988 | .421 | 1.974 | .324 | -.137 | -.742 | .759 | .077 | .733 | -.597 | -1.011 | -.537 | -.615 | 1.064 | -.233 | .000 |
| BEHAVIOR\_CLEANING\_9 | .021 | .018 | 1.471 | -.517 | .314 | -.150 | 1.124 | .786 | .875 | -.063 | -.698 | -1.182 | -.776 | 1.802 | -.532 | 2.376 | .000 |
| BI\_CLEANING3 | 1.743 | -.331 | 2.291 | -.688 | 1.288 | -.677 | .768 | 1.352 | 1.126 | .218 | -.537 | -.454 | 1.050 | -.057 | .509 | .517 | .338 | .000 |
| BI\_CLEANING2 | 1.727 | -.720 | 2.132 | -1.039 | .316 | -1.438 | .004 | .284 | .298 | -.115 | -.503 | -.633 | .518 | -.476 | -.890 | .758 | .092 | -.212 | .000 |
| BI\_CLEANING1 | 1.453 | -1.205 | 1.749 | -1.052 | .215 | -1.000 | .596 | 1.123 | .569 | .022 | -.578 | -.579 | .718 | -.343 | .159 | .411 | .233 | -.112 | .151 | .000 |
| IN\_CLEANING4 | 1.565 | 1.278 | 1.498 | .883 | 1.142 | -1.231 | .948 | 1.067 | .206 | -.270 | .090 | .296 | -.326 | -1.658 | -.313 | -1.083 | -.793 | .481 | -.845 | -1.277 | .000 |
| IN\_CLEANING3 | -.379 | .266 | -.311 | -.792 | .321 | -2.571 | -1.244 | .282 | .133 | -.242 | -.342 | .860 | .010 | -1.729 | .813 | -.615 | -.963 | .659 | -.600 | -.926 | 2.962 | .000 |
| IN\_CLEANING1 | .942 | -1.143 | 1.029 | -1.203 | .650 | -.488 | -.392 | 1.221 | .610 | .525 | .430 | .960 | .611 | -.780 | -.008 | .244 | -.907 | .755 | .708 | .567 | -.827 | -.697 | .000 |
| SE\_CLEANING5 | 3.382 | -.968 | 2.733 | -1.001 | .253 | .813 | .410 | .316 | -.823 | -.429 | -1.084 | -1.363 | .944 | -.415 | -.370 | 1.046 | .121 | .510 | .365 | .583 | .292 | -.925 | 1.704 | .000 |
| SE\_CLEANING4 | -.072 | -2.024 | .460 | -2.264 | -.179 | -1.289 | -.256 | -.325 | 1.267 | -.444 | -.057 | .317 | 1.784 | -.092 | .070 | .457 | .599 | -1.215 | -1.038 | -1.073 | -.729 | -1.124 | -.465 | -.364 | .000 |
| SE\_CLEANING3 | .377 | -1.392 | .884 | -1.950 | -.233 | -1.767 | -.739 | -.484 | 1.973 | 1.568 | 1.061 | 1.697 | 2.315 | 1.704 | 1.741 | 1.884 | 1.782 | 1.096 | .303 | .098 | -.300 | .323 | .794 | -1.219 | .441 | .000 |
| SE\_CLEANING2 | 2.460 | -2.150 | 3.538 | -1.554 | -.430 | -.783 | .324 | .424 | .413 | .046 | -.594 | -.574 | -.171 | .069 | -.120 | .512 | .245 | 1.154 | .640 | .975 | -.529 | -.526 | .766 | .898 | -.133 | -.625 | .000 |
| SE\_CLEANING1 | .622 | -1.946 | -.069 | -2.708 | -.444 | -1.016 | -1.325 | -1.172 | .778 | -.213 | .345 | .743 | 2.353 | .743 | .896 | .673 | .714 | -.508 | -.734 | -.176 | -.962 | -1.264 | -.049 | -.068 | .890 | .395 | -.776 | .000 |
| RE\_CLEANING4 | 4.195 | -.446 | 3.201 | -.287 | .759 | .659 | 1.123 | -.428 | -.782 | -.945 | -1.594 | -1.428 | -.478 | -1.365 | -.595 | -.155 | -.505 | .885 | -.123 | .069 | -.337 | -.954 | .253 | 1.905 | -1.156 | -.786 | 1.231 | -.406 | .000 |
| RE\_CLEANING3 | 2.859 | -.200 | 3.007 | -.192 | .515 | -.374 | .601 | .249 | -.152 | -.208 | -1.002 | -.849 | .328 | -1.109 | -.545 | .383 | -.236 | .550 | -.173 | -.227 | -.647 | -.804 | .884 | 1.054 | -.418 | -.559 | 1.190 | -.177 | .114 | .000 |
| RE\_CLEANING2 | 2.198 | -.146 | 1.593 | .398 | 1.222 | 2.360 | 2.015 | .836 | -1.129 | -1.223 | -1.762 | -1.893 | -1.102 | -2.235 | -1.847 | -1.259 | -1.286 | .161 | -.644 | -.123 | -1.014 | -1.027 | .533 | .575 | -1.288 | -1.514 | .102 | -.647 | .439 | -.695 | .000 |
| RE\_CLEANING1 | 2.479 | -.731 | 2.470 | -.951 | .331 | -1.182 | .588 | .026 | .074 | .066 | -.510 | -.892 | .427 | -1.056 | -.441 | .357 | -.255 | .382 | .104 | .165 | .196 | -.028 | 1.264 | .946 | -.678 | -.533 | 1.306 | -.684 | -.264 | -.008 | 1.105 | .000 |
| DN\_CLEANING4 | 1.661 | -.611 | 1.124 | -1.020 | .176 | -1.431 | -.084 | .385 | .802 | .901 | -.272 | .626 | .225 | -.101 | -.256 | .537 | .151 | .965 | .065 | -.631 | .281 | -.529 | -.562 | .400 | -.705 | 1.543 | .030 | -.464 | -.615 | -.658 | -.557 | -.317 | .000 |
| DN\_CLEANING3 | 1.060 | -.298 | 2.204 | -.521 | -.185 | -1.820 | .187 | -.336 | -.061 | .039 | -.538 | .304 | .652 | -1.052 | .133 | .009 | -.158 | 1.711 | .328 | .054 | .692 | .263 | .373 | 1.288 | .303 | 2.503 | .996 | -.016 | -.290 | -.485 | -.368 | -.030 | -.029 | .000 |
| DN\_CLEANING2 | -.033 | -1.060 | 1.069 | -1.276 | -.156 | -2.878 | -.803 | -.768 | .115 | .164 | -.943 | .115 | .074 | -1.376 | -1.017 | -.651 | -.964 | .258 | .078 | -.842 | -.035 | .574 | .042 | -.134 | .325 | 2.118 | .983 | -.508 | -1.180 | -.533 | -1.111 | .092 | .159 | -.232 | .000 |

##### Notes for Group/Model (Group number 1 - Default model)

##### The following variances are negative. (Group number 1 - Default model)

|  | e40 |
| --- | --- |
|  | -.700 |

This solution is not admissible.

##### Modification Indices (Group number 1 - Default model)

##### Covariances: (Group number 1 - Default model)

|  |  |  | M.I. | Par Change |
| --- | --- | --- | --- | --- |
| e15 | <--> | RP\_CD | 6.767 | -.072 |
| e15 | <--> | DES\_CLEAN | 4.199 | .065 |
| e15 | <--> | e40 | 5.670 | -.061 |
| e14 | <--> | RP\_CD | 7.467 | .070 |
| e14 | <--> | DES\_CLEAN | 4.636 | -.063 |
| e14 | <--> | e40 | 6.630 | .061 |
| e39 | <--> | RP\_CD | 7.009 | -.110 |
| e39 | <--> | EFF\_CLEAN | 15.385 | .134 |
| e39 | <--> | e40 | 6.128 | -.094 |
| e39 | <--> | e14 | 14.727 | .146 |
| e38 | <--> | RP\_CD | 4.653 | .108 |
| e38 | <--> | EFF\_CLEAN | 6.663 | -.108 |
| e38 | <--> | e40 | 4.818 | .100 |
| e38 | <--> | e39 | 12.205 | -.266 |
| e37 | <--> | EFF\_CLEAN | 6.831 | .091 |
| e37 | <--> | e41 | 11.904 | -.256 |
| e37 | <--> | e14 | 5.500 | .091 |
| e37 | <--> | e39 | 32.907 | .362 |
| e36 | <--> | EFF\_CLEAN | 4.746 | -.090 |
| e36 | <--> | e41 | 10.511 | .284 |
| e36 | <--> | e15 | 5.003 | -.111 |
| e36 | <--> | e39 | 13.802 | -.276 |
| e36 | <--> | e38 | 29.022 | .484 |
| e36 | <--> | e37 | 11.936 | -.261 |
| e35 | <--> | RP\_CD | 13.833 | .188 |
| e35 | <--> | e41 | 4.327 | -.176 |
| e35 | <--> | e40 | 15.142 | .179 |
| e35 | <--> | e38 | 4.430 | .192 |
| e35 | <--> | e37 | 5.305 | -.173 |
| e35 | <--> | e36 | 21.361 | .414 |
| e34 | <--> | EFF\_CLEAN | 4.911 | .090 |
| e34 | <--> | e39 | 7.301 | .201 |
| e33 | <--> | INJ\_CLEAN | 4.245 | -.100 |
| e33 | <--> | e35 | 8.030 | -.227 |
| e33 | <--> | e34 | 4.228 | .170 |
| e32 | <--> | RP\_CD | 5.932 | -.112 |
| e32 | <--> | e40 | 6.482 | -.107 |
| e32 | <--> | e14 | 4.356 | -.086 |
| e32 | <--> | e39 | 6.399 | -.171 |
| e30 | <--> | DES\_CLEAN | 4.847 | .063 |
| e30 | <--> | e15 | 8.184 | -.069 |
| e29 | <--> | INJ\_CLEAN | 6.276 | .072 |
| e29 | <--> | e37 | 13.464 | -.156 |
| e29 | <--> | e31 | 13.595 | -.099 |
| e29 | <--> | e30 | 8.976 | .072 |
| e28 | <--> | INTENT\_CLEAN | 5.701 | -.066 |
| e28 | <--> | INJ\_CLEAN | 9.896 | .097 |
| e28 | <--> | e37 | 4.926 | -.102 |
| e28 | <--> | e34 | 6.389 | -.135 |
| e28 | <--> | e29 | 48.614 | .208 |
| e27 | <--> | e15 | 5.827 | .069 |
| e26 | <--> | INJ\_CLEAN | 7.086 | -.077 |
| e26 | <--> | e31 | 27.282 | .142 |
| e26 | <--> | e29 | 6.709 | -.073 |
| e26 | <--> | e28 | 33.723 | -.176 |
| e25 | <--> | e41 | 4.449 | -.105 |
| e25 | <--> | e37 | 4.657 | .093 |
| e25 | <--> | e28 | 7.727 | .084 |
| e25 | <--> | e27 | 11.264 | .098 |
| e24 | <--> | e31 | 4.449 | .057 |
| e24 | <--> | e30 | 5.977 | -.059 |
| e24 | <--> | e29 | 12.598 | -.099 |
| e24 | <--> | e26 | 7.703 | .079 |
| e23 | <--> | INJ\_CLEAN | 10.000 | -.089 |
| e23 | <--> | e31 | 8.906 | .078 |
| e23 | <--> | e29 | 8.451 | -.079 |
| e23 | <--> | e28 | 18.878 | -.127 |
| e23 | <--> | e27 | 7.134 | -.075 |
| e23 | <--> | e26 | 30.933 | .152 |
| e23 | <--> | e25 | 4.290 | -.057 |
| e23 | <--> | e24 | 47.326 | .188 |
| e21 | <--> | INTENT\_CLEAN | 7.825 | -.081 |
| e21 | <--> | DES\_CLEAN | 4.995 | .084 |
| e20 | <--> | e25 | 15.039 | -.096 |
| e19 | <--> | DES\_CLEAN | 8.487 | -.077 |
| e19 | <--> | e35 | 4.241 | -.082 |
| e18 | <--> | RP\_CD | 9.082 | .169 |
| e18 | <--> | INTENT\_CLEAN | 4.349 | -.105 |
| e18 | <--> | e40 | 7.882 | .144 |
| e18 | <--> | e38 | 4.085 | .204 |
| e18 | <--> | e21 | 4.101 | .127 |
| e18 | <--> | e19 | 5.554 | -.104 |
| e17 | <--> | e38 | 7.018 | .248 |
| e17 | <--> | e34 | 4.631 | -.194 |
| e17 | <--> | e28 | 4.491 | .116 |
| e17 | <--> | e26 | 4.179 | -.105 |
| e17 | <--> | e25 | 8.601 | .151 |
| e17 | <--> | e21 | 4.375 | .121 |
| e17 | <--> | e18 | 38.520 | .615 |
| e16 | <--> | RP\_CD | 5.636 | -.084 |
| e16 | <--> | INJ\_CLEAN | 4.779 | -.066 |
| e16 | <--> | EFF\_CLEAN | 4.918 | .063 |
| e16 | <--> | e40 | 6.421 | -.083 |
| e16 | <--> | e14 | 6.135 | .078 |
| e16 | <--> | e23 | 7.140 | -.090 |
| e16 | <--> | e18 | 5.545 | -.158 |
| e16 | <--> | e17 | 4.060 | -.125 |
| e13 | <--> | BE\_CLEAN | 7.631 | -.073 |
| e13 | <--> | e15 | 8.582 | -.082 |
| e13 | <--> | e14 | 13.086 | .096 |
| e13 | <--> | e39 | 12.302 | .152 |
| e13 | <--> | e34 | 7.390 | .141 |
| e13 | <--> | e31 | 7.118 | -.075 |
| e13 | <--> | e28 | 8.391 | -.091 |
| e13 | <--> | e24 | 5.510 | .069 |
| e13 | <--> | e16 | 8.123 | .103 |
| e12 | <--> | INTENT\_CLEAN | 10.746 | -.101 |
| e12 | <--> | EFF\_CLEAN | 6.348 | .068 |
| e12 | <--> | e15 | 16.950 | .132 |
| e12 | <--> | e39 | 4.762 | -.109 |
| e12 | <--> | e31 | 5.955 | .079 |
| e12 | <--> | e30 | 5.648 | -.069 |
| e12 | <--> | e27 | 4.628 | .075 |
| e12 | <--> | e21 | 6.337 | -.097 |
| e11 | <--> | BE\_CLEAN | 7.330 | .089 |
| e11 | <--> | EFF\_CLEAN | 24.312 | -.144 |
| e11 | <--> | DES\_CLEAN | 26.783 | .219 |
| e11 | <--> | e14 | 19.371 | -.145 |
| e11 | <--> | e21 | 7.161 | .111 |
| e11 | <--> | e13 | 21.486 | -.172 |
| e10 | <--> | BE\_CLEAN | 6.512 | -.069 |
| e10 | <--> | INTENT\_CLEAN | 7.980 | .078 |
| e10 | <--> | e15 | 10.104 | -.092 |
| e10 | <--> | e14 | 10.223 | .087 |
| e10 | <--> | e39 | 4.662 | .097 |
| e10 | <--> | e38 | 13.247 | -.201 |
| e10 | <--> | e37 | 20.299 | .205 |
| e10 | <--> | e27 | 11.719 | -.106 |
| e10 | <--> | e13 | 9.817 | .097 |
| e10 | <--> | e11 | 5.943 | -.093 |
| e9 | <--> | RP\_CD | 4.877 | -.070 |
| e9 | <--> | BE\_CLEAN | 4.824 | .062 |
| e9 | <--> | e15 | 6.889 | .077 |
| e9 | <--> | e37 | 6.340 | -.118 |
| e9 | <--> | e30 | 9.974 | -.085 |
| e9 | <--> | e27 | 9.989 | .101 |
| e9 | <--> | e12 | 20.280 | .163 |
| e9 | <--> | e10 | 11.453 | -.110 |
| e8 | <--> | e39 | 14.768 | .157 |
| e8 | <--> | e34 | 7.016 | .129 |
| e8 | <--> | e32 | 9.971 | -.140 |
| e8 | <--> | e13 | 15.773 | .113 |
| e8 | <--> | e12 | 6.071 | -.081 |
| e6 | <--> | e34 | 6.802 | .278 |
| e6 | <--> | e7 | 6.007 | -.124 |
| e5 | <--> | INJ\_CLEAN | 4.026 | .059 |
| e5 | <--> | e34 | 4.044 | -.102 |
| e5 | <--> | e6 | 8.170 | .174 |
| e4 | <--> | BE\_CLEAN | 4.200 | .051 |
| e4 | <--> | INJ\_CLEAN | 4.868 | -.062 |
| e4 | <--> | e39 | 6.225 | .103 |
| e4 | <--> | e30 | 4.098 | .049 |
| e4 | <--> | e27 | 5.436 | -.067 |
| e4 | <--> | e26 | 4.087 | .056 |
| e4 | <--> | e16 | 4.507 | -.073 |
| e4 | <--> | e12 | 4.973 | -.074 |
| e3 | <--> | e25 | 4.843 | .067 |
| e3 | <--> | e21 | 6.417 | .087 |
| e3 | <--> | e11 | 4.288 | .080 |
| e2 | <--> | e39 | 5.599 | -.110 |
| e2 | <--> | e34 | 5.101 | -.125 |
| e2 | <--> | e17 | 4.989 | .126 |
| e2 | <--> | e13 | 9.590 | -.100 |
| e2 | <--> | e12 | 6.181 | .093 |
| e2 | <--> | e11 | 5.345 | .093 |
| e2 | <--> | e10 | 4.312 | .069 |
| e2 | <--> | e8 | 7.101 | -.081 |

##### Variances: (Group number 1 - Default model)

|  |  |  | M.I. | Par Change |
| --- | --- | --- | --- | --- |

##### Regression Weights: (Group number 1 - Default model)

|  |  |  | M.I. | Par Change |
| --- | --- | --- | --- | --- |
| SEF\_CLEAN | <--- | RP\_CD | 6.603 | -.063 |
| SEF\_CLEAN | <--- | SEV\_CD | 4.995 | -.124 |
| RES\_CLEAN | <--- | RP\_CD | 7.267 | .061 |
| RES\_CLEAN | <--- | SEV\_CD | 4.981 | .115 |
| Severity3 | <--- | INTENT\_CLEAN | 5.415 | .117 |
| Severity3 | <--- | EFF\_CLEAN | 6.678 | .155 |
| Severity3 | <--- | SEF\_CLEAN | 7.123 | .142 |
| Severity3 | <--- | RES\_CLEAN | 13.802 | .221 |
| Severity3 | <--- | Severity1 | 4.786 | -.075 |
| Severity3 | <--- | Severity2 | 17.764 | .188 |
| Severity3 | <--- | Severity4 | 4.293 | -.069 |
| Severity3 | <--- | BI\_CLEANING2 | 5.200 | .102 |
| Severity3 | <--- | BI\_CLEANING1 | 4.152 | .093 |
| Severity3 | <--- | SE\_CLEANING5 | 16.525 | .212 |
| Severity3 | <--- | SE\_CLEANING2 | 10.699 | .163 |
| Severity3 | <--- | SE\_CLEANING1 | 4.653 | .094 |
| Severity3 | <--- | RE\_CLEANING4 | 22.696 | .225 |
| Severity3 | <--- | RE\_CLEANING3 | 9.761 | .159 |
| Severity3 | <--- | RE\_CLEANING2 | 4.535 | .071 |
| Severity3 | <--- | RE\_CLEANING1 | 9.621 | .149 |
| Severity3 | <--- | DN\_CLEANING4 | 5.409 | .092 |
| Severity1 | <--- | SEF\_CLEAN | 4.733 | -.143 |
| Severity1 | <--- | Severity3 | 7.185 | -.153 |
| Severity1 | <--- | Severity4 | 9.410 | .126 |
| Severity1 | <--- | SE\_CLEANING5 | 5.845 | -.156 |
| Severity1 | <--- | SE\_CLEANING2 | 13.994 | -.231 |
| Severity1 | <--- | RE\_CLEANING4 | 4.786 | -.128 |
| Severity2 | <--- | INTENT\_CLEAN | 8.670 | .151 |
| Severity2 | <--- | INJ\_CLEAN | 5.617 | .145 |
| Severity2 | <--- | EFF\_CLEAN | 9.673 | .190 |
| Severity2 | <--- | DES\_CLEAN | 5.527 | .106 |
| Severity2 | <--- | SUS\_CD | 12.292 | -.172 |
| Severity2 | <--- | SEF\_CLEAN | 9.508 | .168 |
| Severity2 | <--- | RES\_CLEAN | 13.040 | .219 |
| Severity2 | <--- | Severity3 | 19.149 | .206 |
| Severity2 | <--- | Susceptib1 | 14.539 | -.127 |
| Severity2 | <--- | Susceptib2 | 4.464 | -.079 |
| Severity2 | <--- | Susceptib3 | 6.780 | -.089 |
| Severity2 | <--- | Susceptib4 | 9.699 | -.112 |
| Severity2 | <--- | BEHAVIOR\_CLEANING\_7 | 5.947 | .119 |
| Severity2 | <--- | BI\_CLEANING3 | 7.465 | .113 |
| Severity2 | <--- | BI\_CLEANING2 | 8.684 | .134 |
| Severity2 | <--- | BI\_CLEANING1 | 6.486 | .118 |
| Severity2 | <--- | SE\_CLEANING5 | 10.818 | .175 |
| Severity2 | <--- | SE\_CLEANING3 | 4.648 | .087 |
| Severity2 | <--- | SE\_CLEANING2 | 24.289 | .251 |
| Severity2 | <--- | RE\_CLEANING4 | 12.271 | .169 |
| Severity2 | <--- | RE\_CLEANING3 | 11.762 | .178 |
| Severity2 | <--- | RE\_CLEANING1 | 10.271 | .157 |
| Severity2 | <--- | DN\_CLEANING3 | 7.858 | .118 |
| Severity2 | <--- | DN\_CLEANING2 | 4.527 | .085 |
| Severity4 | <--- | INTENT\_CLEAN | 5.249 | -.140 |
| Severity4 | <--- | INJ\_CLEAN | 4.056 | -.147 |
| Severity4 | <--- | EFF\_CLEAN | 6.346 | -.183 |
| Severity4 | <--- | SUS\_CD | 10.014 | .185 |
| Severity4 | <--- | SEF\_CLEAN | 9.080 | -.195 |
| Severity4 | <--- | RES\_CLEAN | 5.593 | -.171 |
| Severity4 | <--- | Severity3 | 8.216 | -.161 |
| Severity4 | <--- | Severity1 | 11.995 | .143 |
| Severity4 | <--- | Severity2 | 6.635 | -.139 |
| Severity4 | <--- | Susceptib1 | 23.532 | .193 |
| Severity4 | <--- | Susceptib4 | 8.708 | .127 |
| Severity4 | <--- | BI\_CLEANING3 | 4.649 | -.106 |
| Severity4 | <--- | BI\_CLEANING2 | 4.610 | -.116 |
| Severity4 | <--- | IN\_CLEANING1 | 4.182 | -.111 |
| Severity4 | <--- | SE\_CLEANING5 | 8.180 | -.181 |
| Severity4 | <--- | SE\_CLEANING4 | 5.279 | -.115 |
| Severity4 | <--- | SE\_CLEANING3 | 5.197 | -.109 |
| Severity4 | <--- | SE\_CLEANING2 | 9.680 | -.189 |
| Severity4 | <--- | SE\_CLEANING1 | 8.448 | -.154 |
| Severity4 | <--- | RE\_CLEANING4 | 5.161 | -.130 |
| Severity4 | <--- | RE\_CLEANING1 | 5.402 | -.136 |
| Susceptib1 | <--- | RP\_CD | 13.646 | .162 |
| Susceptib1 | <--- | SEV\_CD | 6.354 | .252 |
| Susceptib1 | <--- | Severity1 | 8.813 | .120 |
| Susceptib1 | <--- | Severity4 | 18.557 | .170 |
| Susceptib2 | <--- | BE\_CLEAN | 5.620 | -.198 |
| Susceptib2 | <--- | INTENT\_CLEAN | 4.047 | -.120 |
| Susceptib2 | <--- | INJ\_CLEAN | 5.759 | -.172 |
| Susceptib2 | <--- | DES\_CLEAN | 6.275 | -.132 |
| Susceptib2 | <--- | BEHAVIOR\_CLEANING\_2 | 5.260 | -.134 |
| Susceptib2 | <--- | BEHAVIOR\_CLEANING\_3 | 5.498 | -.130 |
| Susceptib2 | <--- | BEHAVIOR\_CLEANING\_4 | 10.707 | -.182 |
| Susceptib2 | <--- | BEHAVIOR\_CLEANING\_7 | 5.199 | -.130 |
| Susceptib2 | <--- | BI\_CLEANING2 | 4.013 | -.106 |
| Susceptib2 | <--- | IN\_CLEANING4 | 6.796 | -.103 |
| Susceptib2 | <--- | IN\_CLEANING3 | 9.173 | -.129 |
| Susceptib2 | <--- | DN\_CLEANING3 | 5.037 | -.111 |
| Susceptib2 | <--- | DN\_CLEANING2 | 9.463 | -.143 |
| Susceptib4 | <--- | RP\_CD | 5.817 | -.097 |
| Susceptib4 | <--- | Severity3 | 7.925 | -.141 |
| Susceptib4 | <--- | Severity1 | 4.426 | -.078 |
| BEHAVIOR\_CLEANING\_1 | <--- | BEHAVIOR\_CLEANING\_6 | 11.294 | .121 |
| BEHAVIOR\_CLEANING\_2 | <--- | SE\_CLEANING1 | 4.854 | -.056 |
| BEHAVIOR\_CLEANING\_3 | <--- | Severity2 | 11.249 | -.100 |
| BEHAVIOR\_CLEANING\_3 | <--- | BEHAVIOR\_CLEANING\_1 | 4.769 | -.080 |
| BEHAVIOR\_CLEANING\_3 | <--- | BEHAVIOR\_CLEANING\_4 | 14.963 | .121 |
| BEHAVIOR\_CLEANING\_3 | <--- | BEHAVIOR\_CLEANING\_8 | 5.825 | -.095 |
| BEHAVIOR\_CLEANING\_4 | <--- | SUS\_CD | 5.240 | -.080 |
| BEHAVIOR\_CLEANING\_4 | <--- | Severity3 | 4.918 | -.074 |
| BEHAVIOR\_CLEANING\_4 | <--- | Severity2 | 6.856 | -.084 |
| BEHAVIOR\_CLEANING\_4 | <--- | Susceptib2 | 10.194 | -.084 |
| BEHAVIOR\_CLEANING\_4 | <--- | Susceptib3 | 5.683 | -.058 |
| BEHAVIOR\_CLEANING\_4 | <--- | BEHAVIOR\_CLEANING\_3 | 11.911 | .116 |
| BEHAVIOR\_CLEANING\_4 | <--- | BEHAVIOR\_CLEANING\_6 | 13.980 | -.151 |
| BEHAVIOR\_CLEANING\_4 | <--- | BEHAVIOR\_CLEANING\_9 | 6.532 | -.099 |
| BEHAVIOR\_CLEANING\_4 | <--- | SE\_CLEANING5 | 4.299 | -.078 |
| BEHAVIOR\_CLEANING\_5 | <--- | SEF\_CLEAN | 4.712 | .081 |
| BEHAVIOR\_CLEANING\_5 | <--- | SE\_CLEANING5 | 5.126 | .082 |
| BEHAVIOR\_CLEANING\_5 | <--- | SE\_CLEANING4 | 7.963 | .081 |
| BEHAVIOR\_CLEANING\_5 | <--- | SE\_CLEANING1 | 10.754 | .100 |
| BEHAVIOR\_CLEANING\_6 | <--- | Susceptib2 | 4.309 | .051 |
| BEHAVIOR\_CLEANING\_6 | <--- | BEHAVIOR\_CLEANING\_1 | 9.498 | .114 |
| BEHAVIOR\_CLEANING\_6 | <--- | BEHAVIOR\_CLEANING\_4 | 10.285 | -.101 |
| BEHAVIOR\_CLEANING\_6 | <--- | BEHAVIOR\_CLEANING\_9 | 10.661 | .119 |
| BEHAVIOR\_CLEANING\_6 | <--- | IN\_CLEANING4 | 4.800 | -.049 |
| BEHAVIOR\_CLEANING\_6 | <--- | IN\_CLEANING3 | 6.572 | -.062 |
| BEHAVIOR\_CLEANING\_7 | <--- | SUS\_CD | 5.843 | -.079 |
| BEHAVIOR\_CLEANING\_7 | <--- | Susceptib1 | 7.488 | -.061 |
| BEHAVIOR\_CLEANING\_7 | <--- | Susceptib3 | 5.753 | -.055 |
| BEHAVIOR\_CLEANING\_8 | <--- | BEHAVIOR\_CLEANING\_9 | 16.293 | .146 |
| BEHAVIOR\_CLEANING\_8 | <--- | SE\_CLEANING5 | 4.198 | .072 |
| BEHAVIOR\_CLEANING\_9 | <--- | Susceptib2 | 4.101 | .048 |
| BEHAVIOR\_CLEANING\_9 | <--- | BEHAVIOR\_CLEANING\_4 | 5.773 | -.073 |
| BEHAVIOR\_CLEANING\_9 | <--- | BEHAVIOR\_CLEANING\_6 | 12.807 | .131 |
| BEHAVIOR\_CLEANING\_9 | <--- | BEHAVIOR\_CLEANING\_8 | 21.809 | .178 |
| BEHAVIOR\_CLEANING\_9 | <--- | IN\_CLEANING1 | 4.505 | -.062 |
| BI\_CLEANING3 | <--- | DES\_CLEAN | 5.415 | .079 |
| BI\_CLEANING3 | <--- | IN\_CLEANING4 | 6.054 | .063 |
| BI\_CLEANING3 | <--- | IN\_CLEANING3 | 6.265 | .068 |
| BI\_CLEANING3 | <--- | DN\_CLEANING4 | 6.396 | .077 |
| BI\_CLEANING3 | <--- | DN\_CLEANING3 | 9.399 | .097 |
| BI\_CLEANING2 | <--- | BEHAVIOR\_CLEANING\_7 | 6.420 | -.071 |
| BI\_CLEANING1 | <--- | DES\_CLEAN | 4.069 | -.048 |
| BI\_CLEANING1 | <--- | IN\_CLEANING4 | 6.169 | -.045 |
| BI\_CLEANING1 | <--- | DN\_CLEANING4 | 4.897 | -.047 |
| BI\_CLEANING1 | <--- | DN\_CLEANING2 | 5.662 | -.050 |
| IN\_CLEANING4 | <--- | RP\_CD | 6.952 | .128 |
| IN\_CLEANING4 | <--- | Severity1 | 5.856 | .108 |
| IN\_CLEANING4 | <--- | Severity4 | 4.698 | .095 |
| IN\_CLEANING4 | <--- | IN\_CLEANING3 | 19.853 | .208 |
| IN\_CLEANING3 | <--- | Susceptib2 | 4.652 | -.096 |
| IN\_CLEANING3 | <--- | IN\_CLEANING4 | 20.390 | .183 |
| IN\_CLEANING3 | <--- | SE\_CLEANING5 | 4.425 | -.134 |
| IN\_CLEANING1 | <--- | SE\_CLEANING5 | 5.605 | .103 |
| IN\_CLEANING1 | <--- | RE\_CLEANING3 | 4.666 | .092 |
| IN\_CLEANING1 | <--- | RE\_CLEANING1 | 4.221 | .082 |
| SE\_CLEANING5 | <--- | SEV\_CD | 5.005 | .131 |
| SE\_CLEANING5 | <--- | RES\_CLEAN | 5.679 | .099 |
| SE\_CLEANING5 | <--- | Severity3 | 15.090 | .125 |
| SE\_CLEANING5 | <--- | Severity2 | 6.187 | .077 |
| SE\_CLEANING5 | <--- | Susceptib2 | 8.097 | .073 |
| SE\_CLEANING5 | <--- | BEHAVIOR\_CLEANING\_1 | 7.000 | -.101 |
| SE\_CLEANING5 | <--- | BEHAVIOR\_CLEANING\_4 | 7.318 | -.088 |
| SE\_CLEANING5 | <--- | IN\_CLEANING1 | 6.225 | .078 |
| SE\_CLEANING5 | <--- | SE\_CLEANING3 | 6.132 | -.068 |
| SE\_CLEANING5 | <--- | RE\_CLEANING4 | 13.713 | .122 |
| SE\_CLEANING4 | <--- | RP\_CD | 4.345 | -.062 |
| SE\_CLEANING4 | <--- | INTENT\_CLEAN | 5.683 | -.096 |
| SE\_CLEANING4 | <--- | Severity3 | 7.546 | -.102 |
| SE\_CLEANING4 | <--- | BI\_CLEANING3 | 10.210 | -.104 |
| SE\_CLEANING4 | <--- | BI\_CLEANING2 | 4.523 | -.076 |
| SE\_CLEANING4 | <--- | BI\_CLEANING1 | 6.055 | -.090 |
| SE\_CLEANING4 | <--- | SE\_CLEANING1 | 4.807 | .077 |
| SE\_CLEANING4 | <--- | RE\_CLEANING4 | 7.067 | -.101 |
| SE\_CLEANING3 | <--- | BE\_CLEAN | 10.673 | .198 |
| SE\_CLEANING3 | <--- | DES\_CLEAN | 11.709 | .131 |
| SE\_CLEANING3 | <--- | BEHAVIOR\_CLEANING\_1 | 7.204 | .127 |
| SE\_CLEANING3 | <--- | BEHAVIOR\_CLEANING\_2 | 9.452 | .130 |
| SE\_CLEANING3 | <--- | BEHAVIOR\_CLEANING\_3 | 5.962 | .098 |
| SE\_CLEANING3 | <--- | BEHAVIOR\_CLEANING\_4 | 10.390 | .130 |
| SE\_CLEANING3 | <--- | BEHAVIOR\_CLEANING\_5 | 4.760 | .095 |
| SE\_CLEANING3 | <--- | BEHAVIOR\_CLEANING\_6 | 9.581 | .150 |
| SE\_CLEANING3 | <--- | BEHAVIOR\_CLEANING\_7 | 8.618 | .122 |
| SE\_CLEANING3 | <--- | BEHAVIOR\_CLEANING\_8 | 5.304 | .117 |
| SE\_CLEANING3 | <--- | BEHAVIOR\_CLEANING\_9 | 6.741 | .121 |
| SE\_CLEANING3 | <--- | BI\_CLEANING3 | 4.160 | .071 |
| SE\_CLEANING3 | <--- | SE\_CLEANING5 | 7.520 | -.124 |
| SE\_CLEANING3 | <--- | DN\_CLEANING4 | 10.664 | .112 |
| SE\_CLEANING3 | <--- | DN\_CLEANING3 | 14.406 | .136 |
| SE\_CLEANING3 | <--- | DN\_CLEANING2 | 15.085 | .131 |
| SE\_CLEANING2 | <--- | RES\_CLEAN | 5.345 | .099 |
| SE\_CLEANING2 | <--- | Severity3 | 5.261 | .076 |
| SE\_CLEANING2 | <--- | Severity2 | 15.814 | .127 |
| SE\_CLEANING2 | <--- | BEHAVIOR\_CLEANING\_5 | 6.653 | -.093 |
| SE\_CLEANING2 | <--- | BI\_CLEANING1 | 4.260 | .067 |
| SE\_CLEANING2 | <--- | RE\_CLEANING4 | 6.052 | .083 |
| SE\_CLEANING2 | <--- | RE\_CLEANING3 | 4.942 | .081 |
| SE\_CLEANING2 | <--- | RE\_CLEANING1 | 6.783 | .090 |
| SE\_CLEANING1 | <--- | RP\_CD | 5.430 | -.064 |
| SE\_CLEANING1 | <--- | SEV\_CD | 6.172 | -.155 |
| SE\_CLEANING1 | <--- | Severity2 | 10.663 | -.107 |
| SE\_CLEANING1 | <--- | Severity4 | 5.087 | -.056 |
| SE\_CLEANING1 | <--- | Susceptib3 | 5.180 | -.057 |
| SE\_CLEANING1 | <--- | Susceptib4 | 4.233 | -.054 |
| SE\_CLEANING1 | <--- | BEHAVIOR\_CLEANING\_5 | 5.913 | .091 |
| SE\_CLEANING1 | <--- | SE\_CLEANING4 | 5.265 | .070 |
| RE\_CLEANING4 | <--- | Severity3 | 13.746 | .112 |
| RE\_CLEANING4 | <--- | Susceptib2 | 5.504 | .056 |
| RE\_CLEANING4 | <--- | SE\_CLEANING5 | 5.329 | .079 |
| RE\_CLEANING3 | <--- | RE\_CLEANING2 | 4.425 | -.040 |
| RE\_CLEANING2 | <--- | Susceptib2 | 9.022 | .158 |
| RE\_CLEANING1 | <--- | RE\_CLEANING2 | 5.981 | .056 |
| DN\_CLEANING4 | <--- | BEHAVIOR\_CLEANING\_6 | 4.967 | .083 |
| DN\_CLEANING3 | <--- | Severity2 | 4.173 | .065 |
| DN\_CLEANING3 | <--- | BI\_CLEANING3 | 5.414 | .068 |
| DN\_CLEANING3 | <--- | SE\_CLEANING5 | 4.695 | .081 |
| DN\_CLEANING3 | <--- | SE\_CLEANING3 | 5.760 | .068 |
| DN\_CLEANING2 | <--- | Severity3 | 7.155 | -.092 |
| DN\_CLEANING2 | <--- | Susceptib2 | 7.780 | -.076 |

##### Minimization History (Default model)

| Iteration |  | Negative eigenvalues | Condition # | Smallest eigenvalue | Diameter | F | NTries | Ratio |
| --- | --- | --- | --- | --- | --- | --- | --- | --- |
| 0 | e | 28 |  | -1.467 | 9999.000 | 9508.894 | 0 | 9999.000 |
| 1 | e\* | 29 |  | -.403 | 5.108 | 6382.777 | 20 | .173 |
| 2 | e\* | 24 |  | -.547 | 1.975 | 3887.782 | 5 | .915 |
| 3 | e\* | 12 |  | -.335 | .558 | 3212.738 | 5 | .892 |
| 4 | e | 7 |  | -.300 | .780 | 2478.108 | 5 | .916 |
| 5 | e | 5 |  | -.168 | .555 | 2128.187 | 5 | .851 |
| 6 | e | 2 |  | -.130 | .783 | 1744.006 | 5 | .924 |
| 7 | e\* | 0 | 1708.527 |  | .903 | 1514.636 | 5 | .751 |
| 8 | e | 1 |  | -.090 | .604 | 1459.537 | 3 | .000 |
| 9 | e | 0 | 771.419 |  | .402 | 1406.752 | 6 | .971 |
| 10 | e | 1 |  | -.046 | .380 | 1395.368 | 1 | .930 |
| 11 | e | 0 | 6791.969 |  | .063 | 1393.303 | 6 | 1.023 |
| 12 | e | 0 | 2688.051 |  | .102 | 1393.227 | 2 | .000 |
| 13 | e | 0 | 3077.399 |  | .019 | 1393.214 | 1 | 1.014 |
| 14 | e | 0 | 3093.667 |  | .002 | 1393.214 | 1 | 1.001 |
| 15 | e | 0 | 3093.690 |  | .000 | 1393.214 | 1 | 1.000 |

##### Model Fit Summary

##### CMIN

| Model | NPAR | CMIN | DF | P | CMIN/DF |
| --- | --- | --- | --- | --- | --- |
| Default model | 89 | 1393.214 | 541 | .000 | 2.575 |
| Saturated model | 630 | .000 | 0 |
| Independence model | 35 | 9524.194 | 595 | .000 | 16.007 |

##### RMR, GFI

| Model | RMR | GFI | AGFI | PGFI |
| --- | --- | --- | --- | --- |
| Default model | .116 | .796 | .762 | .683 |
| Saturated model | .000 | 1.000 |  |  |
| Independence model | .730 | .144 | .094 | .136 |

##### Baseline Comparisons

| Model | NFI Delta1 | RFI rho1 | IFI Delta2 | TLI rho2 | CFI |
| --- | --- | --- | --- | --- | --- |
| Default model | .854 | .839 | .905 | .895 | .905 |
| Saturated model | 1.000 |  | 1.000 |  | 1.000 |
| Independence model | .000 | .000 | .000 | .000 | .000 |

##### Parsimony-Adjusted Measures

| Model | PRATIO | PNFI | PCFI |
| --- | --- | --- | --- |
| Default model | .909 | .776 | .822 |
| Saturated model | .000 | .000 | .000 |
| Independence model | 1.000 | .000 | .000 |

##### NCP

| Model | NCP | LO 90 | HI 90 |
| --- | --- | --- | --- |
| Default model | 852.214 | 745.778 | 966.303 |
| Saturated model | .000 | .000 | .000 |
| Independence model | 8929.194 | 8616.416 | 9248.388 |

##### FMIN

| Model | FMIN | F0 | LO 90 | HI 90 |
| --- | --- | --- | --- | --- |
| Default model | 4.222 | 2.582 | 2.260 | 2.928 |
| Saturated model | .000 | .000 | .000 | .000 |
| Independence model | 28.861 | 27.058 | 26.110 | 28.025 |

##### RMSEA

| Model | RMSEA | LO 90 | HI 90 | PCLOSE |
| --- | --- | --- | --- | --- |
| Default model | .069 | .065 | .074 | .000 |
| Independence model | .213 | .209 | .217 | .000 |

##### AIC

| Model | AIC | BCC | BIC | CAIC |
| --- | --- | --- | --- | --- |
| Default model | 1571.214 | 1593.010 | 1909.603 | 1998.603 |
| Saturated model | 1260.000 | 1414.286 | 3655.335 | 4285.335 |
| Independence model | 9594.194 | 9602.766 | 9727.268 | 9762.268 |

##### ECVI

| Model | ECVI | LO 90 | HI 90 | MECVI |
| --- | --- | --- | --- | --- |
| Default model | 4.761 | 4.439 | 5.107 | 4.827 |
| Saturated model | 3.818 | 3.818 | 3.818 | 4.286 |
| Independence model | 29.073 | 28.126 | 30.041 | 29.099 |

##### HOELTER

| Model | HOELTER .05 | HOELTER .01 |
| --- | --- | --- |
| Default model | 142 | 147 |
| Independence model | 23 | 24 |

##### Execution time summary

|  |  |
| --- | --- |
| Minimization: | .045 |
| Miscellaneous: | 1.676 |
| Bootstrap: | .000 |
| Total: | 1.721 |
